# Supplementary material for: Ultrasound-Assisted Deep Eutectic Solvent Extraction of Anthocyanins from Blueberry Wine Residues: Optimization, Identification, and HepG2 Antitumor Activity
Source: PubMed Central journal article supplement (PMC7699922; doi:10.3390/molecules25225456), 2020-11-20
Supplement: molecules-25-05456-s001.pdf [file molecules-25-05456-s001.pdf]

## Table of Contents

| CONTENTS                                                            | page |
|---------------------------------------------------------------------|------|
| <b>Fig. S1</b> HPLC-DAD chromatogram of CE (a) and component I (b). | 2    |
| <b>Fig. S2</b> MS spectra of the anthocyanins components in CE.     | 3    |

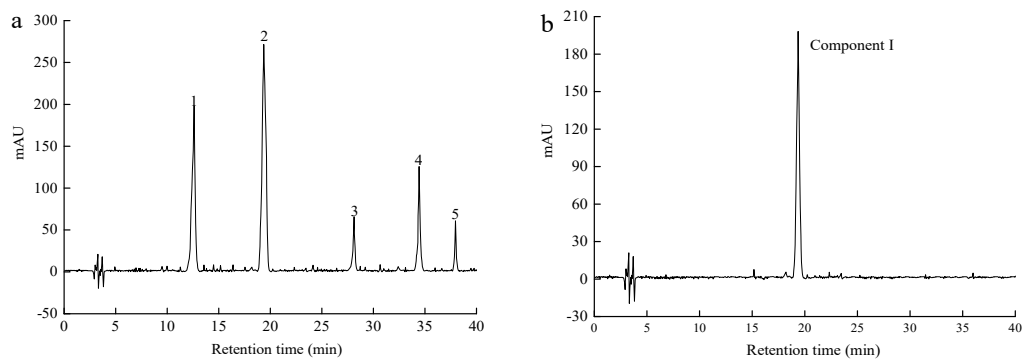

**Fig. S1**

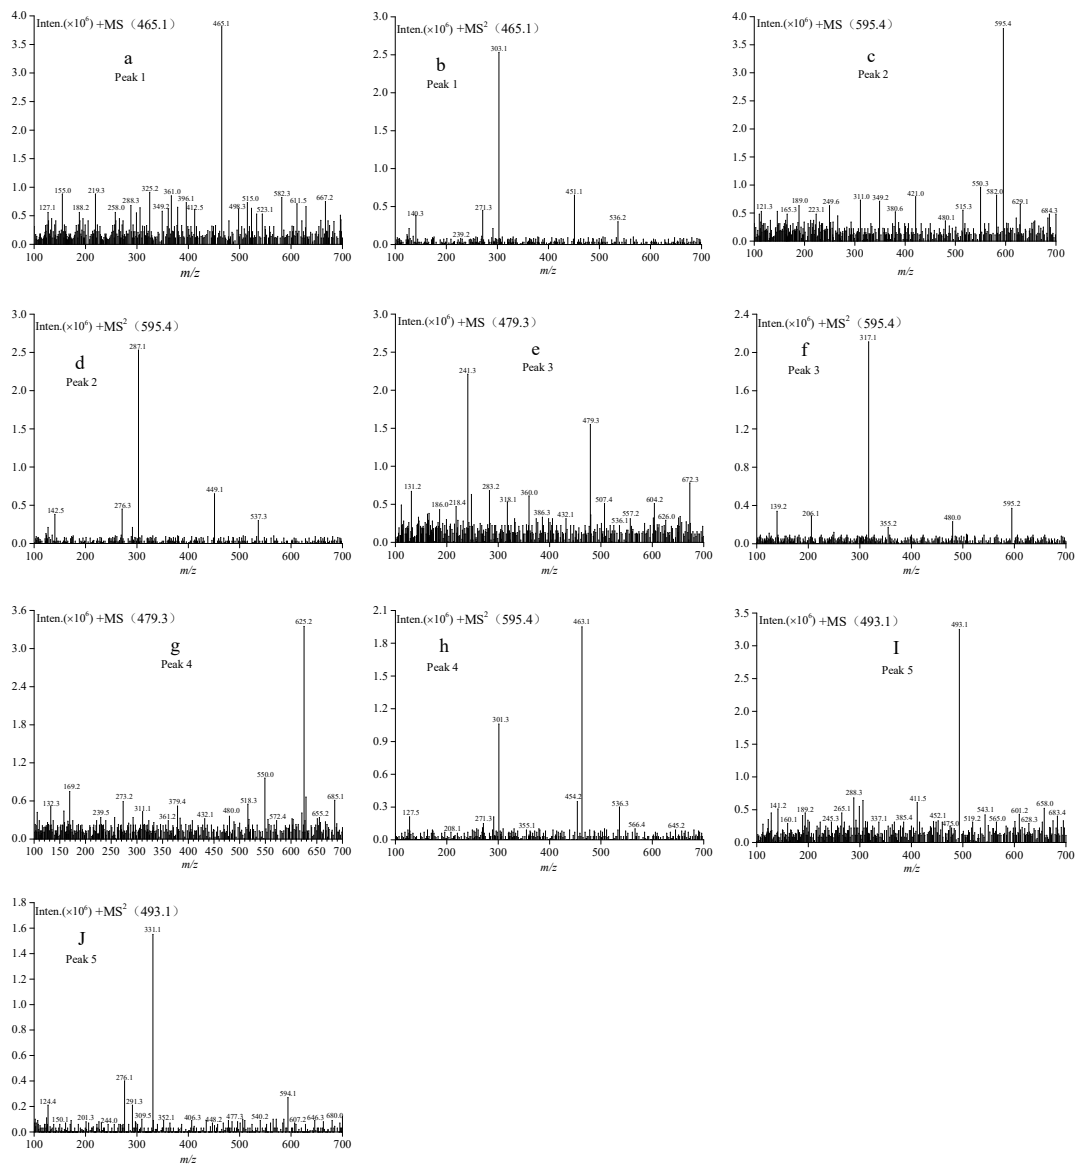

**Fig. S2**
